# Supplementary material for: Distance-Based and Low Energy Adaptive Clustering Protocol for Wireless Sensor Networks
Source: PLoS One. 2016 Sep 22;11(9):e0161340. doi: 10.1371/journal.pone.0161340 (PMC5033373; doi:10.1371/journal.pone.0161340)
Supplement: S2 Table — (DOCX) [file pone.0161340.s019.docx]

**Table 2: Notations and their description**

| **Notation** | **Description** |
| --- | --- |
|  | Set of static nodes |
|  | Set of sink stop locations |
|  | Nodes nearest to the sink trajectory |
|  | Nodes farthest from the sink trajectory |
|  | Data rate generated by node i |
|  | Sink sojourn time where |
|  | Energy of node |
|  | Data transmission rate from node to |
|  | Data reception rate while receiving from node to node |
|  | Minimum distance from node to sink at location |
|  | Nodes transmitting data to sink at location |
|  | Time required for one epoch is s |
|  | Duration required to transmit data from node i to the mobile sink |
|  | Upper bound on the transmission rate between link |
